# Supplementary material for: Exploring Health‐Related Quality of Life in Children With Hypertrophic Cardiomyopathy and Relationship to Physical Activity
Source: PubMed Central journal article supplement — J Am Heart Assoc. 2024 Jun 15;13(12):e033968. doi: 10.1161/JAHA.123.033968 (PMC11255765; doi:10.1161/jaha.123.033968), 2024-06-15
Supplement: JAH3-13-e033968-s001.pdf [file JAH3-13-e033968-s001.pdf]

# **SUPPLEMENTAL MATERIAL**

**Table S1. PedsQL 4.0 scores in comparison to a published large cohort of healthy and chronically ill children. Results are reported as mean (SD).**

|                                                    | <b>Psychosocial Health Summary Score, mean (SD)</b> | <b>Physical Health Summary Score, mean (SD)</b> | <b>Total Score, mean (SD)</b> |
|----------------------------------------------------|-----------------------------------------------------|-------------------------------------------------|-------------------------------|
| <b>Child and Teen Report, current study (n=56)</b> | 72.5 (20.2)                                         | 76.2 (18.5)                                     | 73.8 (18.5)                   |
| <b>Varni et al.* Healthy Children (N=5079)</b>     | 81.8 (14.0)                                         | 87.8 (13.1)                                     | 83.9 (12.5)                   |
| <b>P-value to current study</b>                    | 0.0002                                              | <0.0001                                         | <0.0001                       |
| <b>Varni et al.* Chronic Conditions (N=574)</b>    | 71.3 (17.1)                                         | 79.5 (10.1)                                     | 74.2 (15.4)                   |
| <b>P-value to current study</b>                    | 0.63                                                | 0.15                                            | 0.87                          |

\*= Varni et al. 2001 (23)

**Table S2. Proportion of cohort greater than one standard deviation lower than the mean score with comparison to a reference population [95% CI of proportion].**

|                                     | <b>Score</b>          | <b>Current Study</b>          | <b>Varni et al.*</b>               |
|-------------------------------------|-----------------------|-------------------------------|------------------------------------|
| <b>Child and Teen Report</b>        | Psychosocial Score    | 10/56 (17.8%)<br>[8.9-30.4%]  | 941/5963 (15.8%)<br>[14.9-16.7%]   |
|                                     | Physical Health Score | 11/56 (19.6%)<br>[10.2-32.2%] | 881/5962 (14.8%)<br>[13.9-15.7%]   |
|                                     | Total Score           | 11/56 (19.6%)<br>[10.2-32.2%] | 1010/5972 (16.9%)<br>[16.0-17.9%]  |
| <b>Parent and Child/Teen Report</b> | Psychosocial Score    | 9/56 (16.1%)<br>[7.6-28.0%]   | 1802/10071 (17.9%)<br>[17.2-18.7%] |
|                                     | Physical Health Score | 9/56 (16.1%)<br>[7.6-28.0%]   | 1722/10050 (17.1%)<br>[16.4-17.9%] |
|                                     | Total Health Score    | 11/56 (17.8%)<br>[8.9-30.4%]  | 1840/10070 (18.3%)<br>[17.5-19.0%] |

\*= Varni et al. 2001 (23)
